# Supplementary material for: Isolation of a Novel Polyketide from Neodidymelliopsis sp
Source: MDPI journal article supplement (doi:10.3390/molecules26113235), 2021-05-27
Supplement: s1 [file s1]

Supplementary Material

# Isolation of a Novel Polyketide from *Neodidymelliopsis* sp.

Melissa M. Cadelis <sup>1,2,\*</sup>, Hugo Gordon <sup>1</sup>, Alex Grey <sup>2</sup>, Soeren Geese <sup>2</sup>, Daniel R. Mulholland <sup>2</sup>, Bevan S. Weir <sup>3</sup>, Brent R. Copp <sup>1,†</sup> and Siouxsie Wiles <sup>2,\*,†</sup>

<sup>1</sup> School of Chemical Sciences, University of Auckland, Private Bag 92019, Auckland 1142, New Zealand; hgor595@aucklanduni.ac.nz (H.G.); b.copp@auckland.ac.nz (B.R.C.)

<sup>2</sup> Bioluminescent Superbugs Lab, School of Medical Sciences, University of Auckland, Private Bag 92019, Auckland 1142, New Zealand; alex.grey@auckland.ac.nz (A.G.); s.geese@auckland.ac.nz (S.G.); d.mulholland@auckland.ac.nz (D.R.M.)

<sup>3</sup> Manaaki Whenua – Landcare Research, Private Bag 92170, Auckland 1142, Auckland, New Zealand; WeirB@landcareresearch.co.nz

\* Correspondence: m.cadelis@auckland.ac.nz (M.M.C.); s.wiles@auckland.ac.nz (S.W.) Tel.: (M.M.C.); (S.W.)

† These authors contributed equally to this work.

## Contents

|                                                                                                                              |            |
|------------------------------------------------------------------------------------------------------------------------------|------------|
| <b>Figure S1</b> <sup>1</sup> H-NMR spectrum (400 MHz, CD <sub>3</sub> OD) of <b>1</b>                                       | <b>S2</b>  |
| <b>Figure S2</b> <sup>1</sup> H-NMR spectrum (400 MHz, CD <sub>3</sub> OD) of <b>1</b> and <b>3</b>                          | <b>S3</b>  |
| <b>Figure S3</b> <sup>13</sup> C-NMR spectrum (100 MHz, CD <sub>3</sub> OD) of <b>1</b> and <b>3</b>                         | <b>S4</b>  |
| <b>Figure S4</b> COSY spectrum (CD <sub>3</sub> OD) of <b>1</b> and <b>3</b>                                                 | <b>S5</b>  |
| <b>Figure S5</b> HSQC spectrum (CD <sub>3</sub> OD) of <b>1</b> and <b>3</b>                                                 | <b>S6</b>  |
| <b>Figure S6</b> HMBC spectrum (CD <sub>3</sub> OD) of <b>1</b> and <b>3</b>                                                 | <b>S7</b>  |
| <b>Figure S7</b> <sup>1</sup> H-NMR spectrum (400 MHz, CD <sub>3</sub> OD) of <b>4</b>                                       | <b>S8</b>  |
| <b>Figure S8</b> <sup>13</sup> C-NMR spectrum (100 MHz, CD <sub>3</sub> OD) of <b>4</b>                                      | <b>S9</b>  |
| <b>Figure S9</b> <sup>1</sup> H-NMR spectrum (400 MHz, CDCl <sub>3</sub> ) of <b>6</b>                                       | <b>S10</b> |
| <b>Figure S10</b> <sup>13</sup> C-NMR spectrum (100 MHz, CDCl <sub>3</sub> ) of <b>6</b>                                     | <b>S11</b> |
| <b>Figure S11</b> <sup>13</sup> C-NMR spectrum (100 MHz, CDCl <sub>3</sub> ) of <b>5</b>                                     | <b>S12</b> |
| <b>Figure S12</b> <sup>13</sup> C-NMR spectrum (100 MHz, CDCl <sub>3</sub> ) of 1- <sup>13</sup> C acetate labelled <b>5</b> | <b>S13</b> |

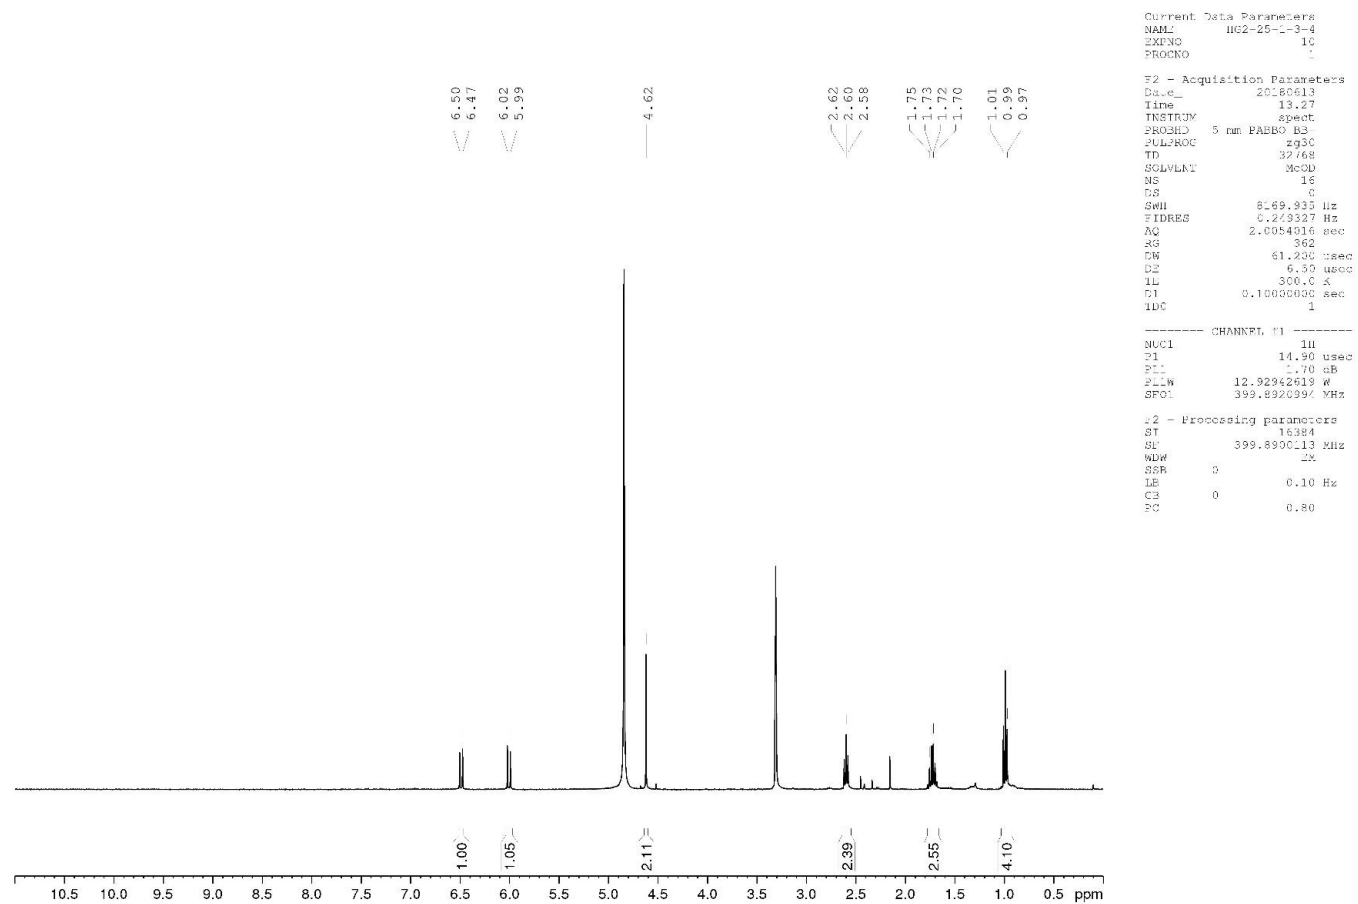

**Figure S1**  $^1\text{H}$ -NMR spectrum (400 MHz,  $\text{CD}_3\text{OD}$ ) of **1**

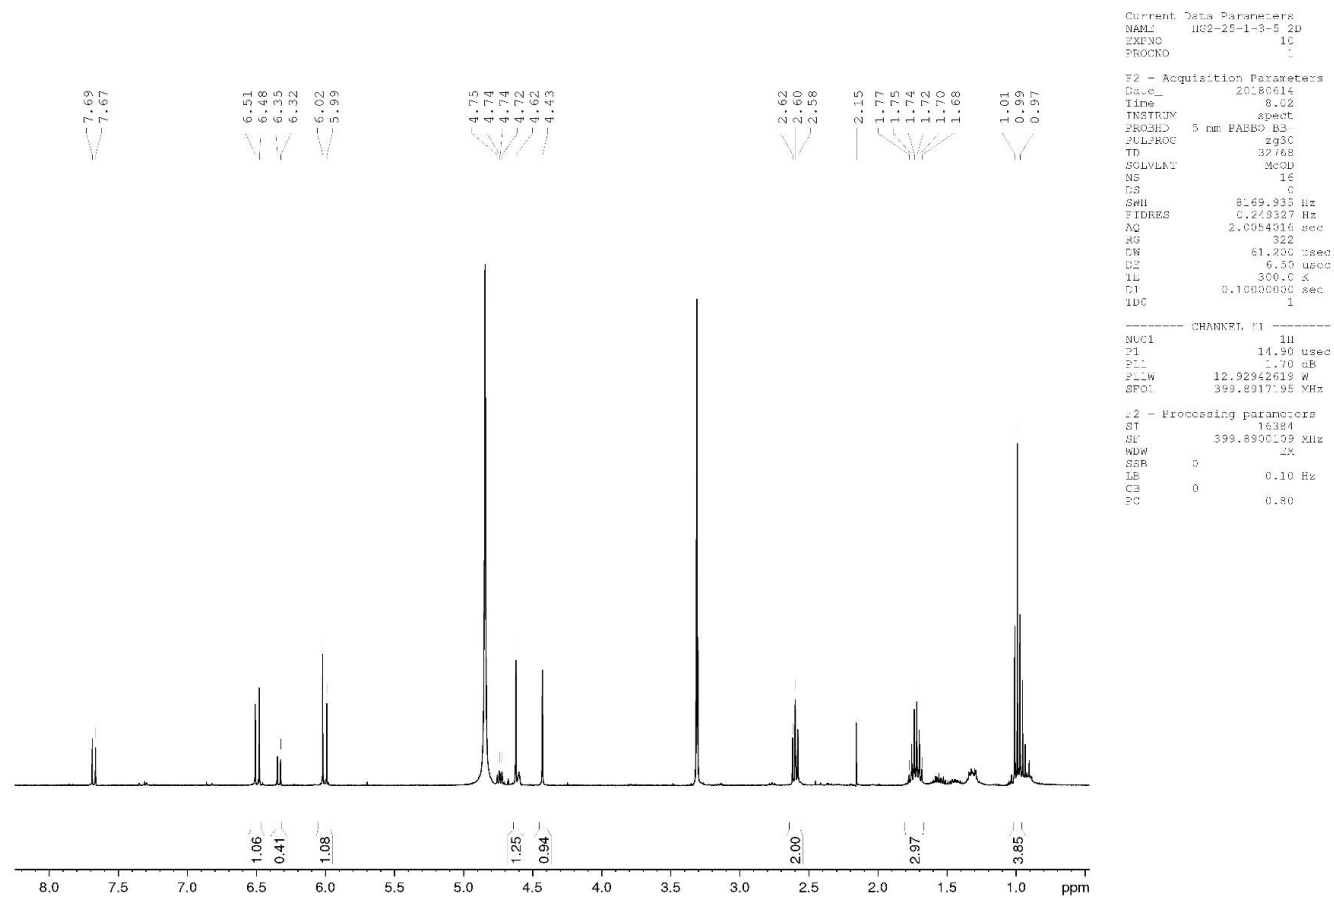

**Figure S2**  $^1\text{H}$ -NMR spectrum (400 MHz,  $\text{CD}_3\text{OD}$ ) of a mixture of **1** and **3**

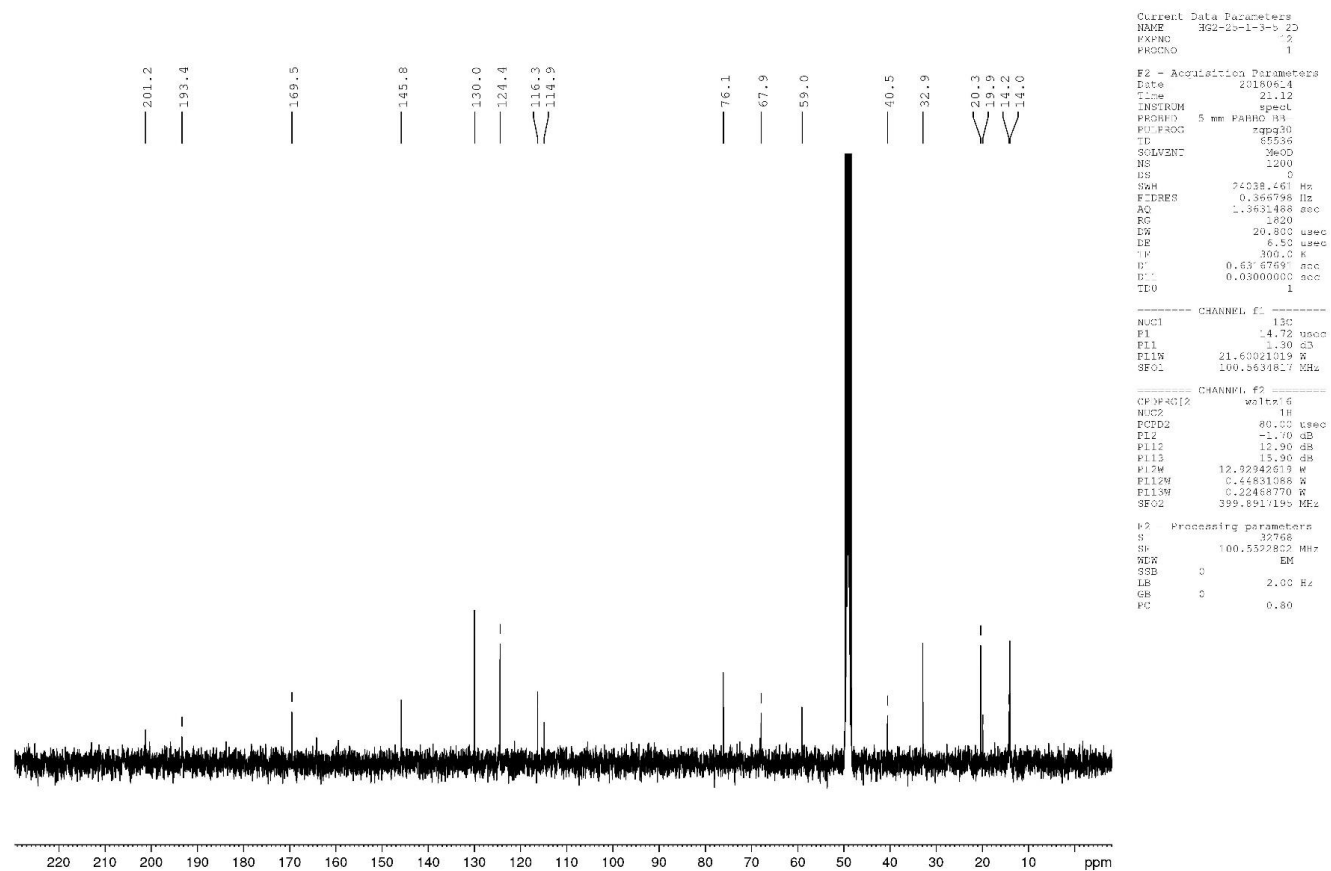

**Figure S3**  $^{13}\text{C}$ -NMR spectrum (100 MHz,  $\text{CD}_3\text{OD}$ ) of a mixture of **1** and **3**

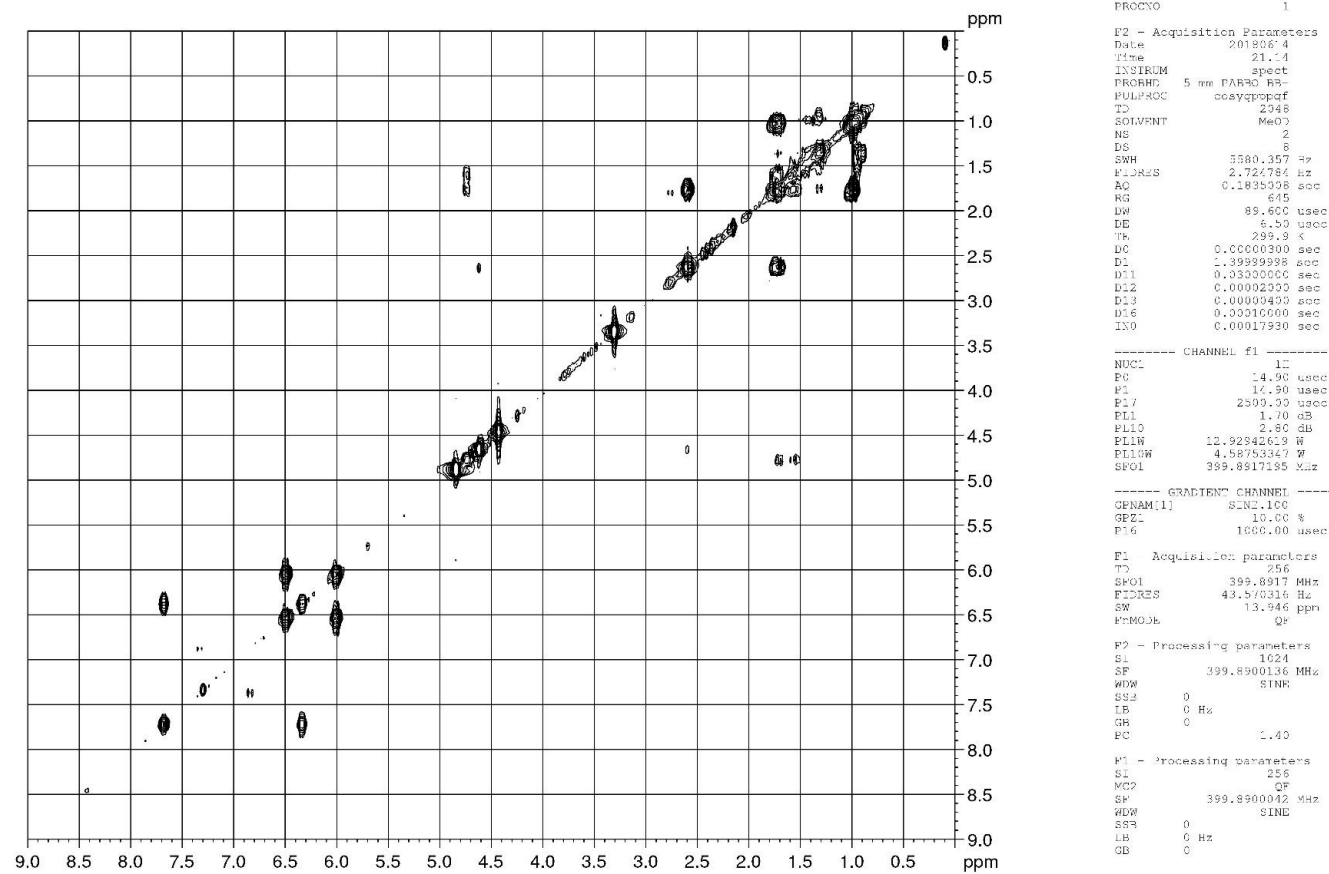

Figure S4 COSY spectrum (CD<sub>3</sub>OD) of **1** and **3**

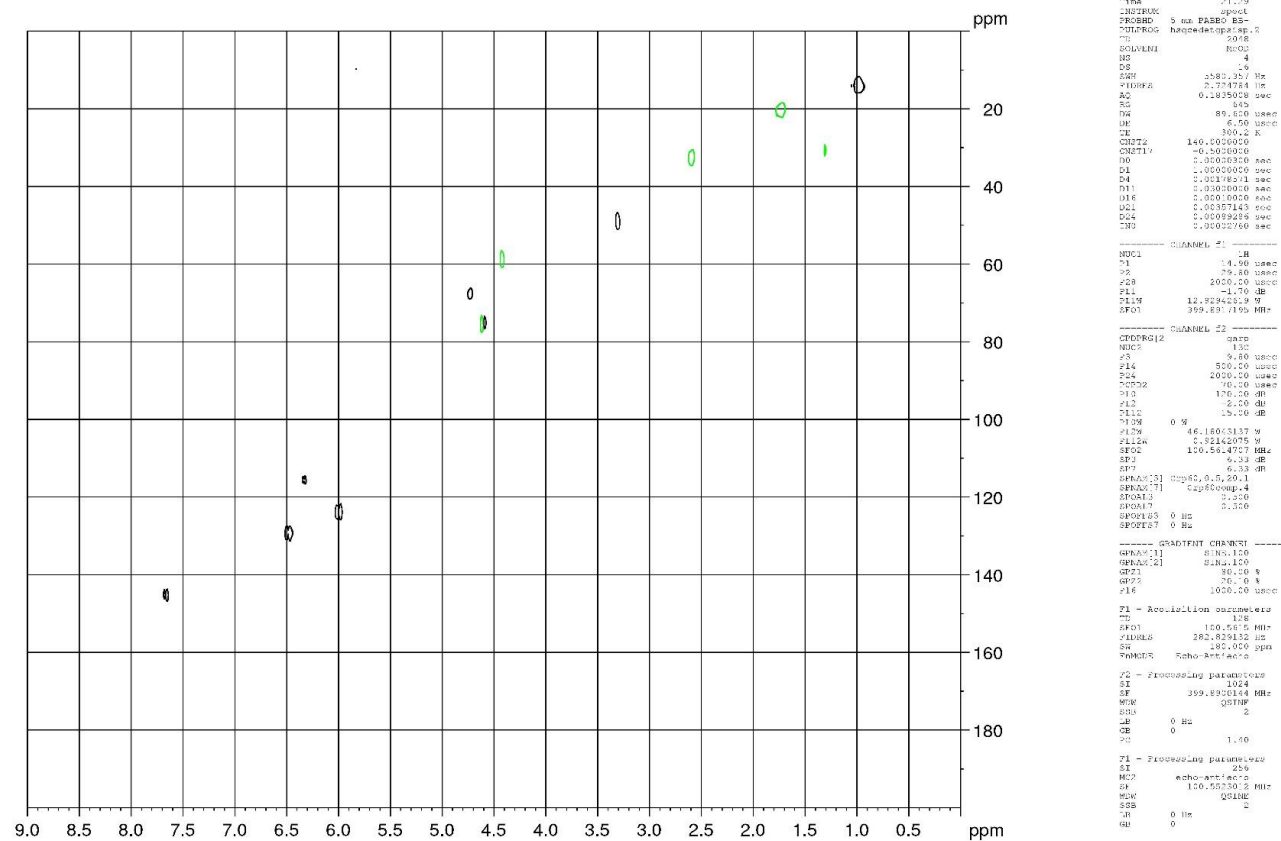

Figure S5 HSQC spectrum (CD<sub>3</sub>OD) of 1 and 3

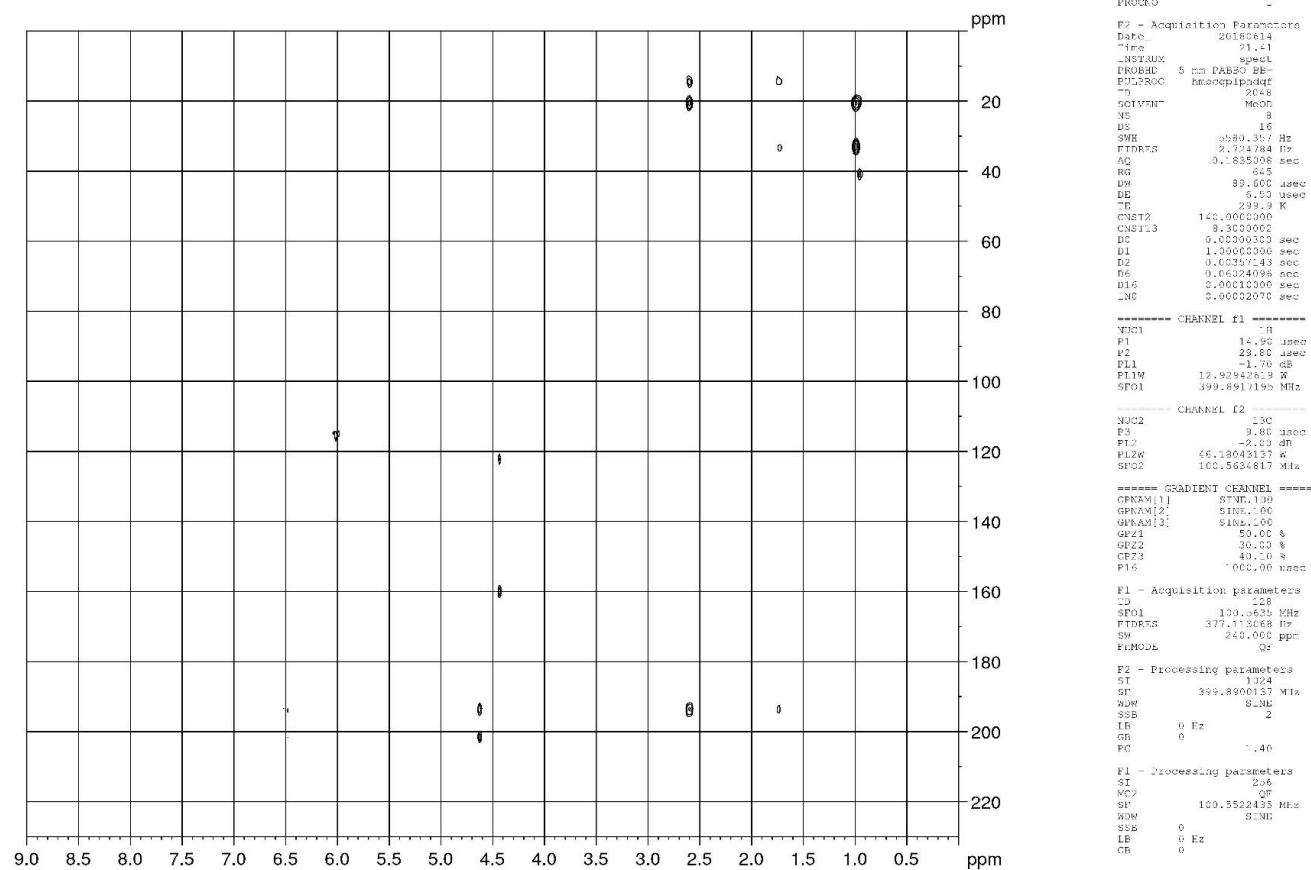

Figure S6 HMBC spectrum (CD<sub>3</sub>OD) of **1** and **3**

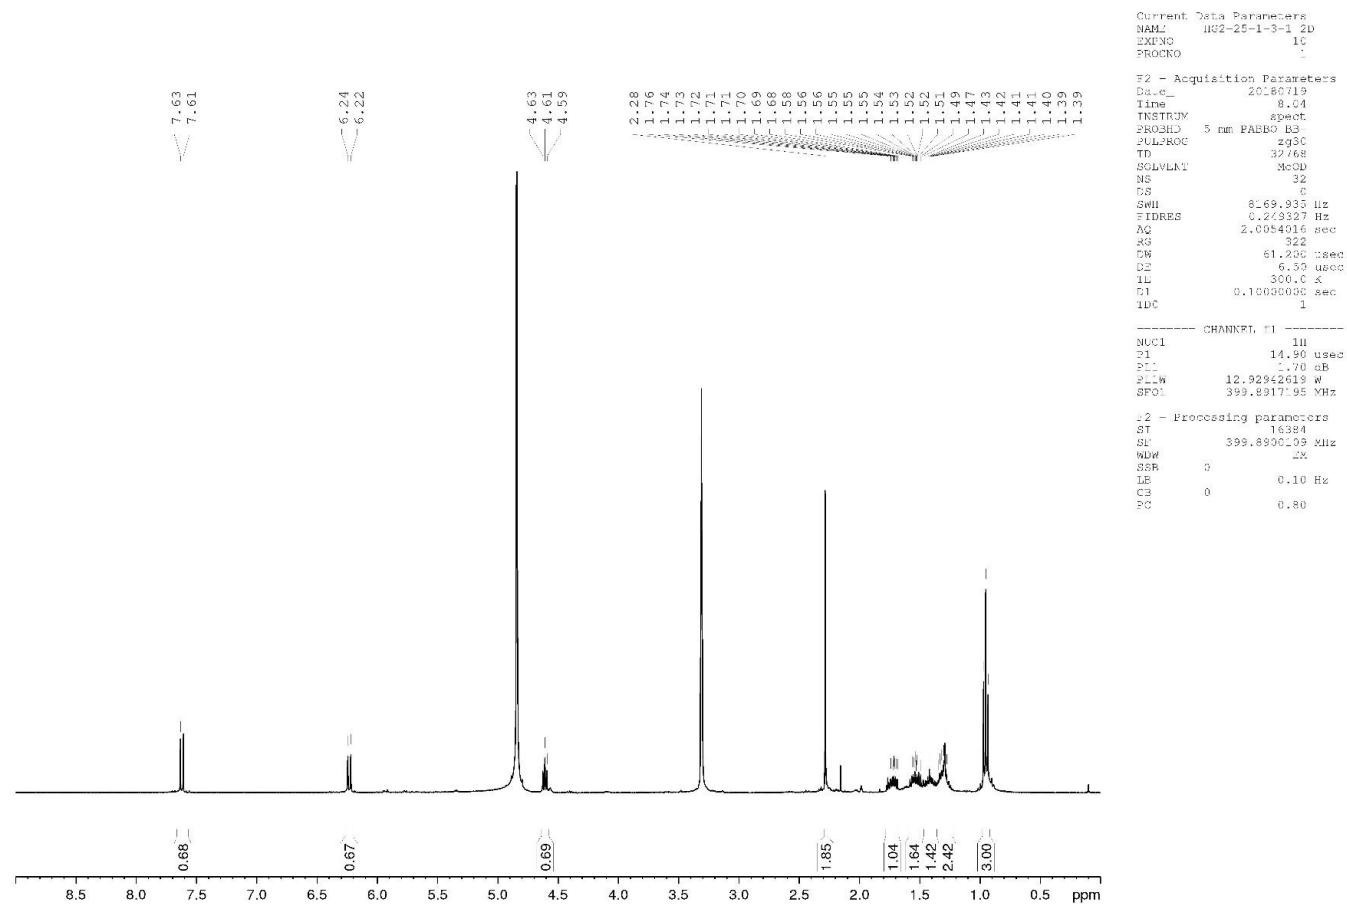

**Figure S7**  $^1\text{H}$ -NMR spectrum (400 MHz,  $\text{CD}_3\text{OD}$ ) of **4**



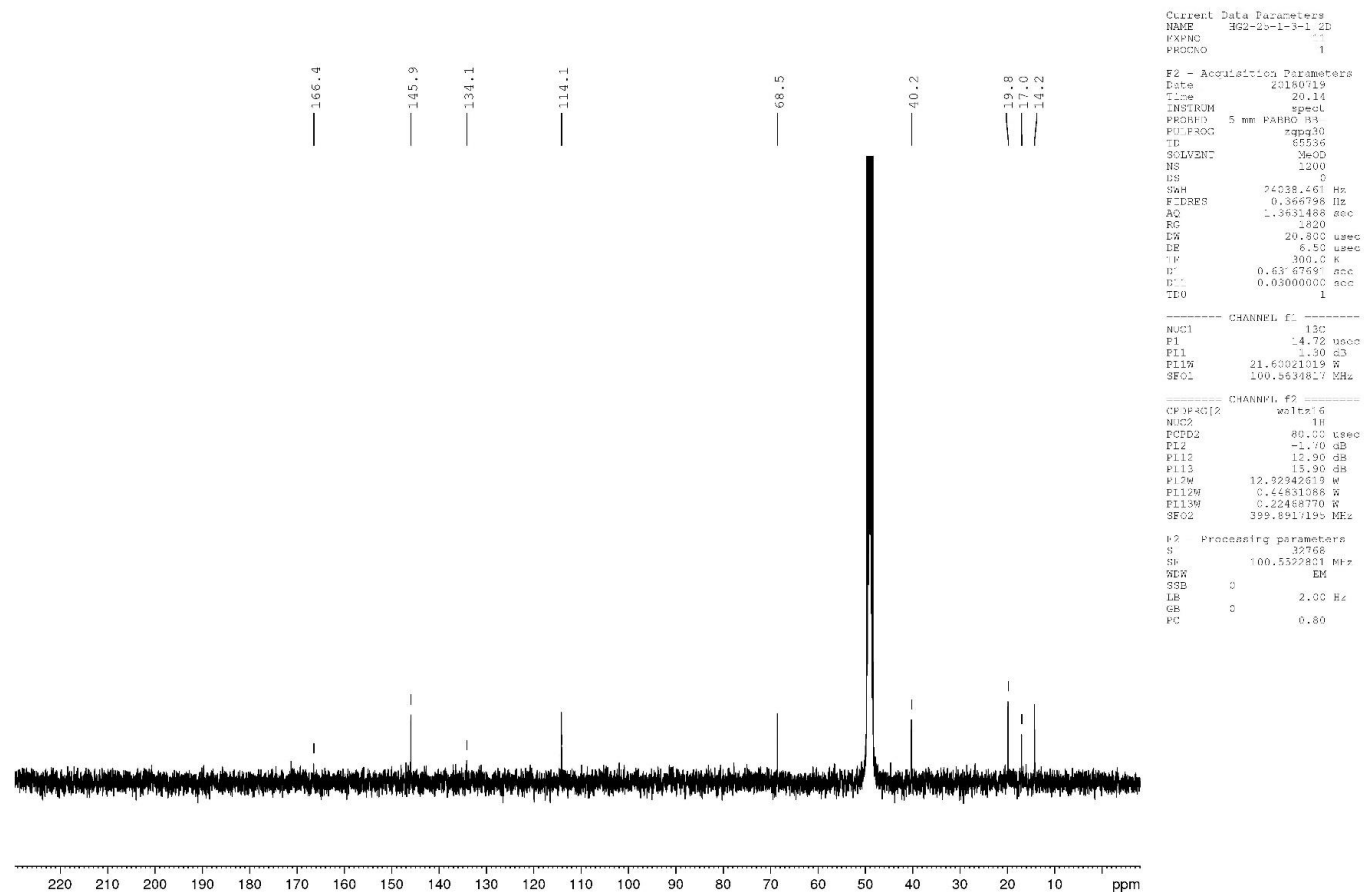

**Figure S8**  $^{13}\text{C}$ -NMR spectrum (100 MHz,  $\text{CD}_3\text{OD}$ ) of **4**

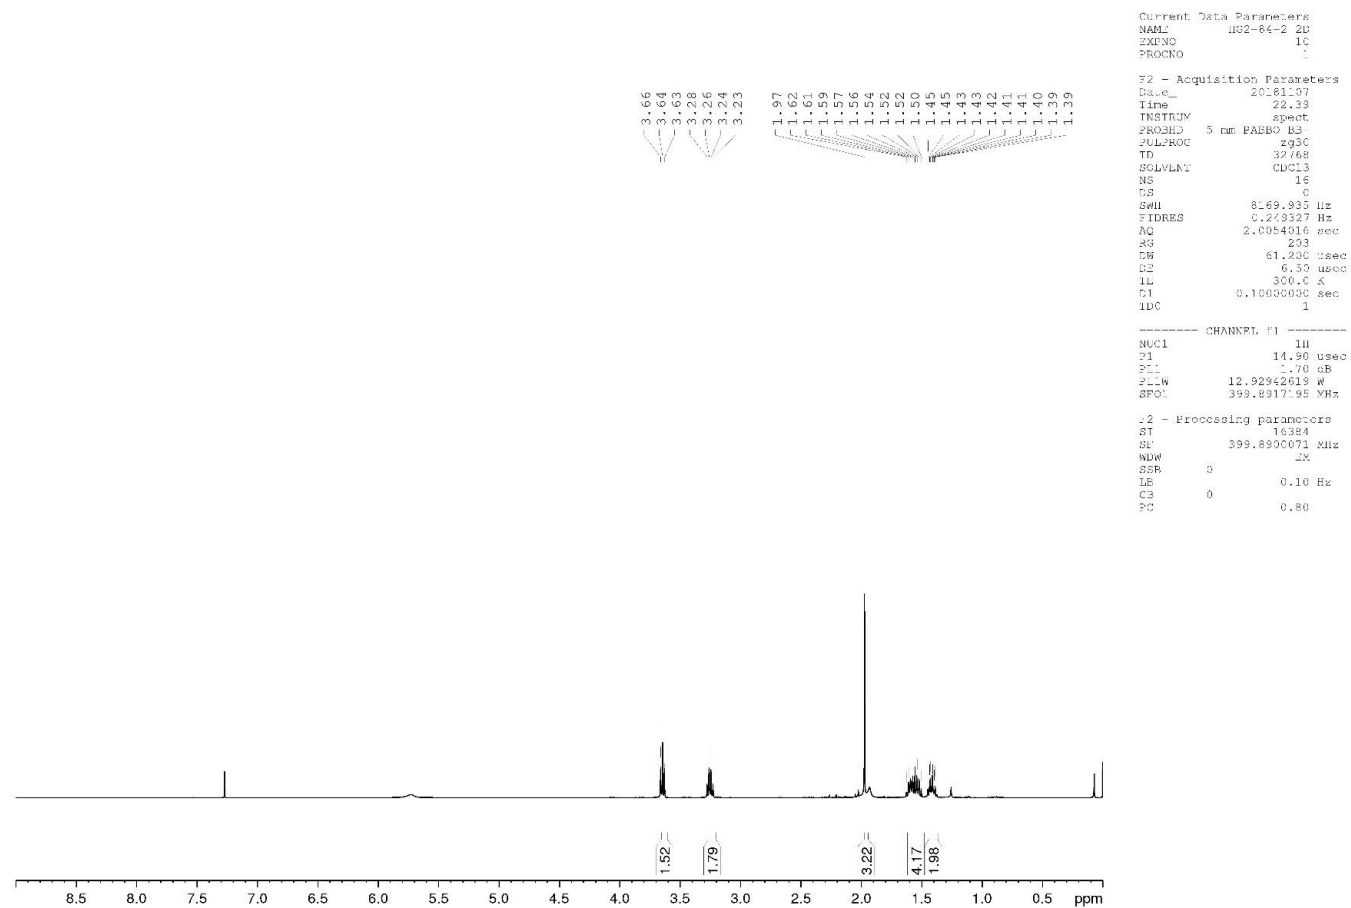

**Figure S9**  $^1\text{H}$ -NMR spectrum (400 MHz,  $\text{CDCl}_3$ ) of **6**

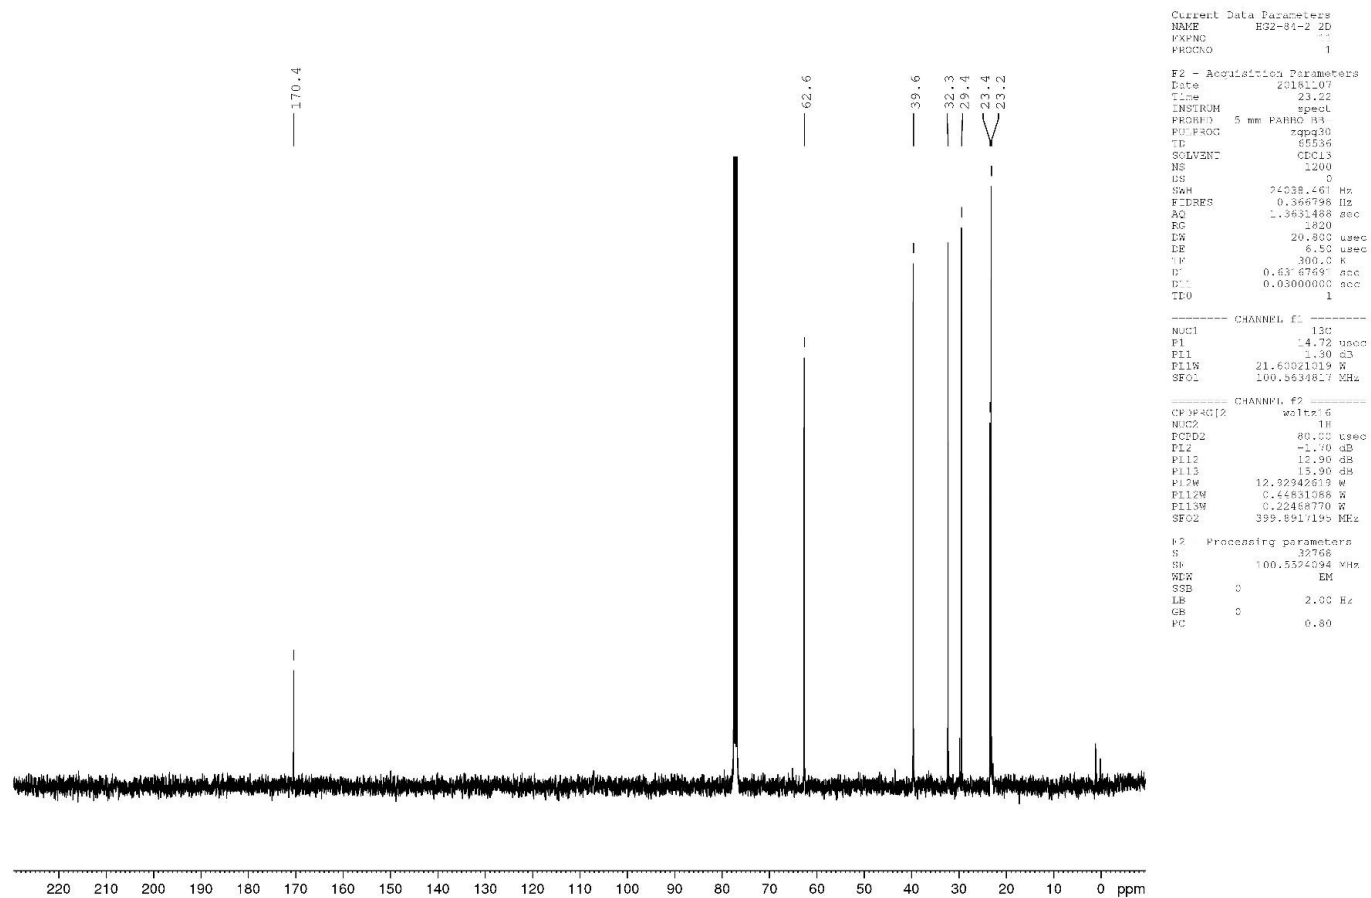

**Figure S10**  $^{13}\text{C}$ -NMR spectrum (100 MHz,  $\text{CDCl}_3$ ) of **6**

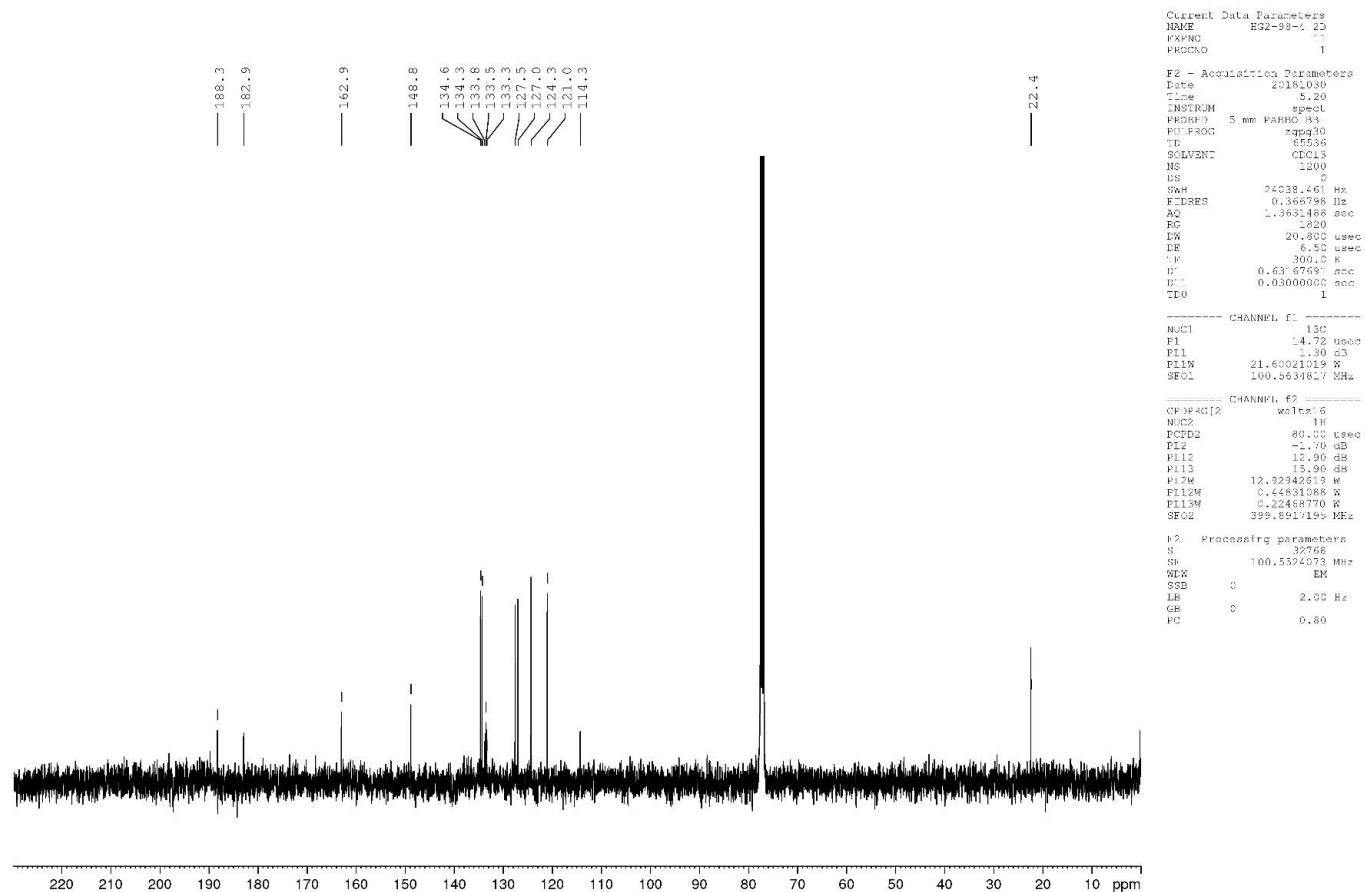

**Figure S11**  $^{13}\text{C}$ -NMR spectrum (100 MHz,  $\text{CDCl}_3$ ) of **5**

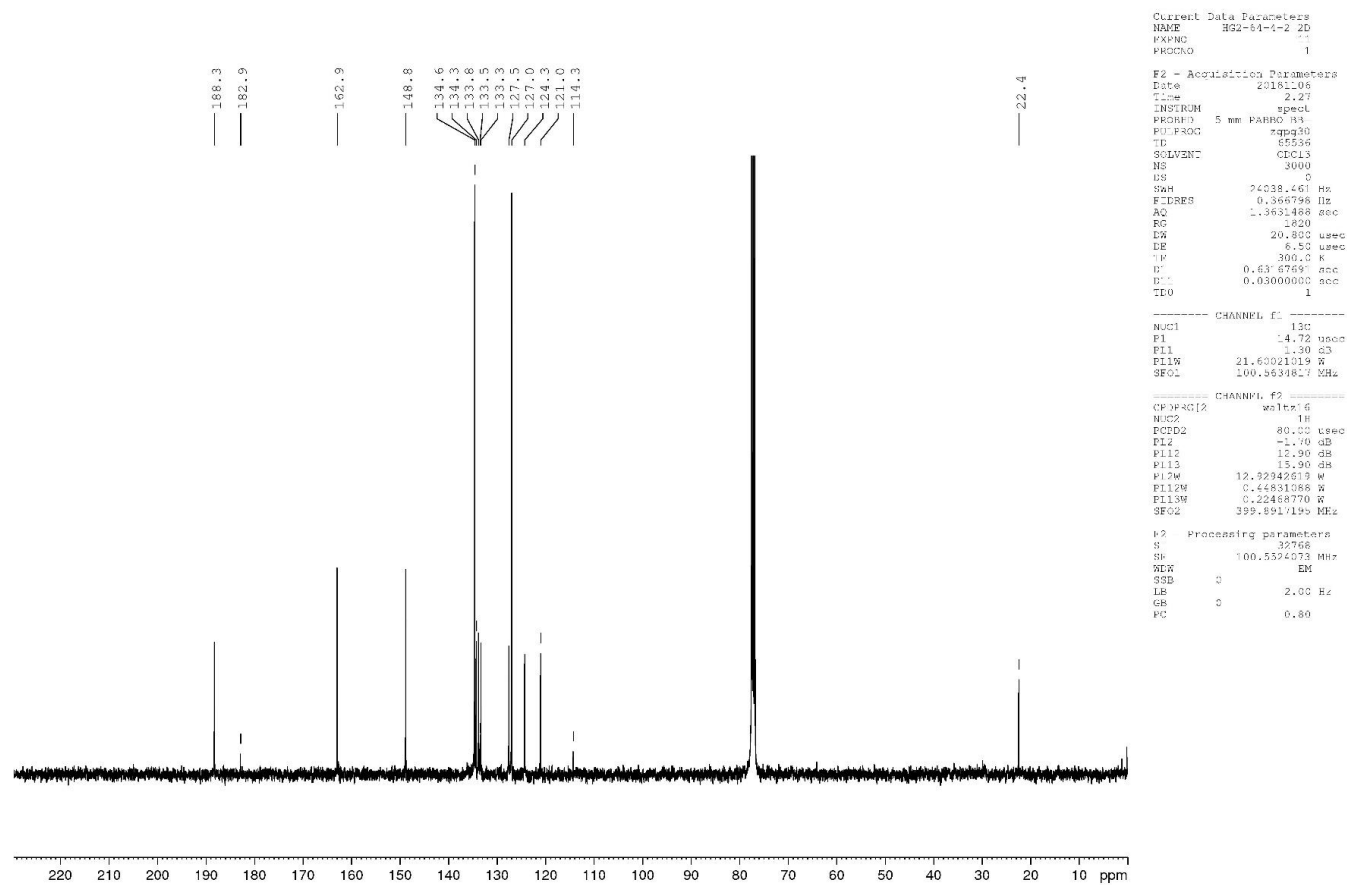

**Figure S12**  $^{13}\text{C}$ -NMR spectrum (100 MHz,  $\text{CDCl}_3$ ) of 1- $^{13}\text{C}$  acetate labelled **5**
